# Supplementary material for: Zoning for Spatial Conservation and Restoration Based on Ecosystem Services in Highly Urbanized Region: A Case Study in Beijing-Tianjin-Hebei, China
Source: MDPI journal article supplement (doi:10.3390/land12040733), 2023-03-24
Supplement: s1 [file s1]

Archive with 1 entries (1 files):
- land-2203116-supplementary.pdf
