# Supplementary material for: Zoning for Spatial Conservation and Restoration Based on Ecosystem Services in Highly Urbanized Region: A Case Study in Beijing-Tianjin-Hebei, China
Source: MDPI journal article supplement (doi:10.3390/land12040733), 2023-03-24
Supplement: s1 [file s1 › land-2203116-supplementary.pdf]

## Supplementary Information

### 1. Water Retention

Water retention (WR) is calculated by combining water yield with runoff coefficient, terrain index, and soil saturated hydraulic conductivity. The calculation formula are as follows :

$$WR = \min(1, \frac{249}{Velocity}) \times \min(1, \frac{0.9 \times TI}{3}) \times \min(1, \frac{Ksat}{300}) \times Y_x$$

$$Y_x = (1 - \frac{AET_x}{P_x}) \times P_x$$

Where WR is the amount of water retention(mm);  $Y_x$  is the water yield of grid x (mm);  $AET_x$  is the annual actual evapotranspiration value for grid x(mm);  $P_x$  refers to annual precipitation for grid x (mm); the parameters such as evapotranspiration coefficient and maximum root depth were set by reference[1-3] (Table S1). Velocity set by USDA-NRCS National Engineering Manual (dimensionless); TI is the terrain index, which is calculated by the multi-flow method[4] (dimensionless);  $ksat$  is the soil water retention rate (mm), which is calculated based on Neuro Theta software.

Table S1 Biophysical parameters for water yield calculation

| Lucode | LULC_desc              | Kc   | Root_depth (mm) | Lulc_veg |
|--------|------------------------|------|-----------------|----------|
| 1      | Arbor forest           | 1    | 7000            | 1        |
| 2      | Shrub wood             | 0.6  | 6000            | 1        |
| 3      | Sparsewood             | 0.5  | 5500            | 1        |
| 4      | Graden plot            | 0.6  | 2000            | 1        |
| 5      | Nursery                | 0.5  | 1500            | 1        |
| 6      | Other forest           | 0.45 | 3000            | 1        |
| 7      | Nature grassland       | 0.65 | 1000            | 1        |
| 8      | Artifical grassland    | 0.6  | 1000            | 1        |
| 9      | Paddy field            | 0.75 | 700             | 1        |
| 10     | Non-irrigated farmland | 0.6  | 800             | 1        |
| 11     | Water body             | 1    | 1               | 0        |
| 12     | Building               | 0.3  | 1               | 0        |
| 13     | Road                   | 0.3  | 1               | 0        |
| 14     | Bare soil              | 0.2  | 1               | 0        |
| 15     | Others                 | 0.3  | 1               | 0        |

## 2. Soil Retention

In InVEST Sediment Delivery Ratio (SDR) model, the Universal Soil Loss Equation (RUSLE) was used to calculate soil retention, the calculation formula are as follows :

$$RKLS_x = R_x \cdot K_x \cdot LS_x$$

$$USLE_x = R_x \cdot K_x \cdot LS_x \cdot C_x \cdot P_x$$

$$SEDR_x = SE_x \sum_{y=1}^{x=1} USLE_y \prod_{z=y+1}^{x=1} (1 - SE_z)$$

$$SEDRET_x = RKLS_x - USLE_x + SEDR_x$$

where  $R_x$  refers to rainfall erosivity factor ( $\text{MJ}\cdot\text{mm}/\text{ha}\cdot\text{h}\cdot\text{y}$ );  $k_x$  refers to soil erodibility factor ( $\text{t}\cdot\text{ha}\cdot\text{h}/\text{ha}\cdot\text{MJ}\cdot\text{mm}$ );  $LS_x$  refers to the slope length factor and steepness(dimensionless);  $C_x$  is the vegetation management factor (dimensionless);  $P_x$  is the soil practice factor(dimensionless),which was modified from wu et al[5] (Table S2);  $SEDR_x$  is the amount of sediment intercepted by the grid unit ( $\text{t}/(\text{hm}^2\cdot\text{a})$ );  $RKLS$ - $USLE$  is the sediment of the grid unit itself ( $\text{t}/(\text{hm}^2\cdot\text{a})$ );  $SEDRET_x$  is the soil retention of grid unit  $x$  ( $\text{t}/(\text{hm}^2\cdot\text{a})$ ).

Table S2 Biophysical table for the soil retention calculation

| ID | LULC_desc              | usle_c | usle_p |
|----|------------------------|--------|--------|
| 1  | Arbor forest           | 0.02   | 1      |
| 2  | Shurbwood              | 0.14   | 1      |
| 3  | Sparse shurb           | 0.08   | 1      |
| 4  | Mixed forest           | 0.06   | 1      |
| 5  | Bamboo forest          | 0.02   | 1      |
| 6  | Afforestation          | 0.004  | 1      |
| 7  | Young plantation       | 0.08   | 1      |
| 8  | Sparse shrub grass     | 0.22   | 1      |
| 9  | Garden plot            | 0.089  | 0.69   |
| 10 | Natural grassland      | 0.16   | 1      |
| 11 | Artifical grassland    | 0.45   | 1      |
| 12 | Paddy field            | 0      | 0.1    |
| 13 | Non-irrigated farmland | 0.57   | 0.3    |
| 14 | Water body             | 0      | 0.1    |
| 15 | Building               | 0.01   | 0.001  |
| 16 | Road                   | 0.01   | 0.001  |

|    |                    |      |       |
|----|--------------------|------|-------|
| 17 | Other construction | 0.01 | 0.001 |
| 18 | Desert             | 0.7  | 1     |

### 3. Carbon Storage

The InVEST Carbon Storage and Sequestration model combines land use data and four carbon pools to calculate the carbon storage of the ecosystem: aboveground biomass, belowground biomass, soil and dead organic matter

$$C_i = C_{i(above)} + C_{i(below)} + C_{i(dead)} + C_{i(soil)}$$

Where  $C_i$  represents the carbon density (Mg/ha) of grid cell  $i$ ;  $C_{i(above)}$ ,  $C_{i(below)}$ ,  $C_{i(dead)}$ ,  $C_{i(soil)}$  are aboveground biomass carbon density, belowground biomass carbon density, dead organic carbon density and soil organic carbon density (Mg/ha), respectively; the carbon density value used in the module mainly refers to the research of wang et al[6] (see Table S3).

Table S3 Carbon density of different land cover types in Beijing-Tianjin-Hebei region  
(Mg·hm<sup>-2</sup>)

| ID | LULC_desc              | $C_{i,above}$ | $C_{i,below}$ | $C_{i,soil}$ | $C_{i,dead}$ |
|----|------------------------|---------------|---------------|--------------|--------------|
| 1  | Forest                 | 30.23         | 9.07          | 151.4        | 3            |
| 2  | Garden plot            | 13.13         | 3.94          | 110.6        | 0.51         |
| 3  | Grassland              | 1.03          | 2.61          | 62.9         | 0.24         |
| 4  | Paddy field            | 8.3           | 0.83          | 92.9         | 0            |
| 5  | Non-irrigated farmland | 6.6           | 0.66          | 92.9         | 0            |
| 6  | Water                  | 2.29          | 0             | 17.16        | 0            |
| 7  | Urban land             | 7.61          | 4.51          | 42.17        | 0            |
| 8  | Unutilized land        | 9.1           | 14.2          | 22.63        | 0            |

### 4. Heat mitigation

The module first calculates CC (Cooling Capacity) Index, and then further considers the influence of large-area green space (> 2ha) on the surrounding area to calculate the HM:

$$CC = 0.6 \cdot shade + 0.2 \cdot albedo + 0.2 \cdot ETI$$

$$HMI = \begin{cases} CC_i & \text{if } CC_i \geq CC_{parki} \text{ or } GA_i < 2ha \\ CC_{parki} & \text{otherwise} \end{cases}$$

Where CC represents the cooling capacity index; shade represents the shading capacity provided by trees; albedo is the surface albedo; ETI refers to the evapotranspiration index.  $CC_{parki}$  is the cooling capacity of grid unit  $i$  calculated according to the distance from grid unit  $i$  to green space and CC value.  $GA_i$  is the amount of green areas within a search distance around each pixel; The shading capacity, surface albedo and maximum influence distance of green space of different land use types were set according to the research of Zawadzka et al[7] (see Table S4).

Table S4 Parameters of urban cooling module

| lucode | LULC_desc                 | shade | kc   | albedo | greenarea |
|--------|---------------------------|-------|------|--------|-----------|
| 1      | Arbor forest              | 1     | 1    | 0.15   | 1         |
| 2      | Shrub wood                | 1     | 0.6  | 0.23   | 1         |
| 3      | Sparseshurb               | 1     | 0.5  | 0.2    | 1         |
| 4      | Mix forest                | 1     | 0.45 | 0.15   | 1         |
| 5      | Bamboo forest             | 1     | 0.45 | 0.15   | 1         |
| 6      | Other forest              | 1     | 0.45 | 0.2    | 1         |
| 7      | Garden plot               | 1     | 0.6  | 0.15   | 1         |
| 8      | Nursery                   | 1     | 0.5  | 0.15   | 1         |
| 9      | Natural grassland         | 0     | 0.65 | 0.2    | 1         |
| 10     | Artificial grassland      | 0     | 0.6  | 0.2    | 1         |
| 11     | Paddy field               | 0     | 1    | 0.06   | 0         |
| 12     | Non-irrigated farmland    | 0     | 0.6  | 0.25   | 0         |
| 13     | Water                     | 0     | 1    | 0.06   | 0         |
| 14     | Multi-storey construction | 0     | 0.3  | 0.15   | 0         |
| 15     | Low-rise construction     | 0     | 0.3  | 0.18   | 0         |
| 16     | Road                      | 0     | 0.3  | 0.23   | 0         |
| 17     | Other construction        | 0     | 0.3  | 0.16   | 0         |
| 18     | Desert                    | 0     | 0.2  | 0.25   | 0         |

## Reference:

1. Canadell, J.; Jackson, R B.; Ehleringer, J B.; Mooney, H A.; Sala, O E.; Schulze, E D. Maximum rooting depth of vegetation types at the global scale. *Oecologia*. **1996**, 108(4): 583-595.
2. Schenk, H J.; Jackson, R B. Rooting Depths, Lateral Root Spreads and Below-Ground/Above-Ground Allometries of Plants in Water-Limited Ecosystems. *Journal of Ecology*. **2002**, 90(3): 480-494.
3. Allen R G.; Pruitt W O.; Raes D.; Martin, S S.; Luis, P. Estimating Evaporation from Bare Soil and the Crop Coefficient for the Initial Period Using Common Soils Information. *Journal of Irrigation and Drainage Engineering*. **2005**, 131(1): 14-23.
4. Quinn, P.; Beven, K.; Chevallier, P.; Planchon, O. The prediction of hillslope flow paths for distributed hydrological modelling using digital terrain models. *Hydrological Processes*. **1991**, 5(1):

59-79.

5. Jian-Sheng, W.; Feng, Z.; Yang, Gao. Peng Jian. Hotspot and relationship identification in multiple landscape services: A case study on an area with intensive human activities. *Ecological Indicators*. **2013**, 29: 529-537.
6. Xu-Yang, W.; Yu-Qiang, L.; Xiang-Wen, G.; Ya-Yi, N.; Yin-Qing, C.; Xiao-Ping, S.; Wei, L. Storage, pattern and driving factors of soil organic carbon in an ecologically fragile zone of northern China. *Geoderma*. **2019**, 343: 155-165.
7. Zawadzka, J E.; Harris, J A.; Corstanje, R. Assessment of heat mitigation capacity of urban greenspaces with the use of InVEST urban cooling model, verified with day-time land surface temperature data. *Landscape and Urban Planning*. **2021**, 214: 104163.
